1 **“Emotional stress is more detrimental than the virus itself”: Towards an understanding of**  
2 **HIV testing and pre-exposure prophylaxis (PrEP) use among internal migrant men in**  
3 **South Africa**

4  
5 Maria F. Nardell,<sup>1,2,§</sup> Caroline Govathson,<sup>3,4</sup> Salomé Garnier,<sup>5</sup> Ashley Watts,<sup>6</sup> Dolapo Babalola,<sup>7</sup>  
6 Nkosinathi Ngcobo,<sup>3,4</sup> Lawrence Long,<sup>3,4,8</sup> Mark N. Lurie,<sup>9</sup> Jacqui Miot,<sup>3,4</sup> Sophie Pascoe,<sup>\*3,4</sup> Ingrid T.  
7 Katz<sup>\*2,10</sup>

8  
9 <sup>1</sup>Division of Global Health Equity, Brigham and Women’s Hospital, Boston, MA, USA

10 <sup>2</sup>Harvard Medical School, Boston, MA, USA

11 <sup>3</sup>Health Economics and Epidemiology Research Office (HE<sup>2</sup>RO), Johannesburg, South Africa

12 <sup>4</sup>Faculty of Health Sciences, University of the Witwatersrand, Johannesburg, South Africa

13 <sup>5</sup>EHESP French School of Public Health, Paris, France

14 <sup>6</sup>Harvard University, Boston, MA, USA

15 <sup>7</sup>College of Medicine, University of Ibadan, Nigeria

16 <sup>8</sup>Department of Global Health, Boston University School of Public Health, Boston, MA, USA

17 <sup>9</sup>Brown University School of Public Health, Brown University, Providence, Rhode Island, USA

18 <sup>10</sup>Division of Women’s Health, Brigham and Women’s Hospital, Boston, MA, USA

19 \*Equal contribution

20  
21 <sup>§</sup>Corresponding author: Maria Francesca Nardell

41 **Abstract**

42

43 **Introduction**

44 South Africa has one of the highest rates of internal migration on the continent, largely  
45 comprised of men seeking labor in urban centers. South African men who move within the  
46 country (internal migrants) are at higher risk than non-migrant men of acquiring HIV yet are less  
47 likely to test or use pre-exposure prophylaxis (PrEP). However, little is known about the  
48 mechanisms that link internal migration and challenges engaging in HIV services.

49

50 **Methods**

51 We recruited 30 internal migrant men (born outside Gauteng Province) for in-depth qualitative  
52 interviews at sites in Johannesburg (Gauteng) where migrants may gather (i.e., factories,  
53 homeless shelters). Interviewers used open-ended questions, based in the Theory of Triadic  
54 Influence, to explore experiences and challenges with HIV testing and/or PrEP. A mixed  
55 deductive inductive content analytic approach was used to review data and explain why  
56 participants may or may not use these services.

57

58 **Results**

59 Migrant men come to Johannesburg to find work, but their struggle to survive without reliable  
60 income causes daily stress. Stress and time constraints limit their availability to seek health  
61 services, and many men lack knowledge about the opportunity for PrEP should they test  
62 negative. In addition, migrants must also adjust to life in Johannesburg, where they may be  
63 unfamiliar with where to access HIV services and lack social support to help them do so.  
64 Migrants may also continue to travel intermittently for work or social purposes, which can make  
65 it hard to take a daily pill like PrEP. Yet Johannesburg also presents opportunities for HIV  
66 services for migrant men, especially those who perceive greater availability and anonymity of  
67 HIV information and services in the city as compared to their rural homes of origin.

68

69 **Conclusions**

70 Bringing HIV services to migrant men at community sites may ease the burden of accessing  
71 these services. Including PrEP counseling and services alongside HIV testing may further

72 encourage men to test, particularly if integrated into counseling for livelihood and coping  
73 strategies, as well as support for navigating health services in Johannesburg.

74

75

76 **Introduction**

77

78 Despite substantial progress, South Africa continues to have one of the world's largest HIV  
79 epidemics, with approximately 7.5 million people living with HIV.<sup>1</sup> While women shoulder a  
80 greater burden of HIV than men in South Africa,<sup>2</sup> there are major gaps in reaching men with HIV  
81 services.<sup>3-6</sup> In particular, it is estimated that only half of men living with HIV in South Africa  
82 know their status,<sup>3,7</sup> and levels of HIV testing for men remain consistently lower than those for  
83 women.<sup>8-10</sup> Men with HIV also have lower rates of treatment adherence, viral suppression, and  
84 survival.<sup>3,11,12</sup> Alongside efforts to help men living with HIV to start and stay on treatment, it is  
85 imperative to focus on testing and prevention for men not already infected.<sup>13</sup> Oral pre-exposure  
86 prophylaxis (PrEP) is highly effective at preventing HIV.<sup>14-17</sup> South African men have shown  
87 interest in using PrEP,<sup>18,19</sup> but barriers to men's use of HIV services include masculine norms  
88 which discourage care seeking, anticipated stigma in health facilities, poverty and  
89 unemployment, and lack of knowledge about PrEP.<sup>3,20</sup> In addition, most PrEP services in South  
90 Africa have targeted women, men who have sex with men, and sex workers.<sup>21-24</sup> Concerns about  
91 the cost-effectiveness of providing PrEP to heterosexual men may limit its implementation.<sup>25</sup>  
92 Despite this, South Africa's National Strategic Plan for HIV, TB, and STIs 2017-2022  
93 recommends PrEP for anyone who reports being at risk for HIV, including heterosexual men.<sup>26</sup>  
94 Thus, it is important to understand how to target PrEP delivery to men for whom it may provide  
95 greatest benefit.

96

97 South African men who move within the country, called internal migrants,<sup>27,28</sup> bear as much as  
98 two to three times the burden of HIV as compared to non-migrant men in South Africa,<sup>29,30</sup> as  
99 well as a higher burden than international migrants.<sup>30</sup> Associations between HIV vulnerability  
100 and migration are complex and vary among migrant groups.<sup>31</sup> Some studies have shown that  
101 migrant men are at higher risk for HIV acquisition during the disruptive process of relocation<sup>32</sup>  
102 and engage in higher sexual risk behaviors.<sup>33</sup> Other research has shown that men living with HIV  
103 are more likely to become migrants than those who are HIV negative, in part due to marital  
104 dissolution, which people living with HIV are more likely to experience.<sup>27</sup> Compared to non-  
105 migrants, internal migrants are less likely to use health services overall, more likely to use  
106 private services or traditional healers, and less likely to test for HIV.<sup>34,35</sup> Migrants are identified

107 as a “key population” for HIV prevention,<sup>31</sup> but only 15% internal migrant men surveyed in  
108 community sites in Johannesburg were aware of PrEP.<sup>30</sup> HIV interventions that seek to engage  
109 men in testing and prevention, such as workplace programs and partner notification strategies,<sup>36</sup>  
110 may exclude men who are unemployed or unpartnered, as is common for migrant men.<sup>30</sup>  
111 Moreover, large trials to improve HIV testing uptake among men in South Africa have found  
112 substantial challenges reaching men in communities with high mobility and in-migration.<sup>37</sup> South  
113 Africa has one of the highest rates of internal migration on the continent<sup>38</sup> with an estimated net  
114 migration of a million internal migrants settling in urban Gauteng Province from 2016 to 2021  
115 alone, dwarfing the number of international immigrants by as many as five to one.<sup>39</sup>

116  
117 Research to unpack the relationship between migration, masculinity, and barriers to HIV testing  
118 and prevention in South Africa has been limited. In particular, there is a lack of research on  
119 internal migrants’ experience with HIV care, for whom factors such as xenophobia within the  
120 healthcare system and lack of knowledge of the South African health care system may not  
121 apply.<sup>40–42</sup> In this paper, we seek to fill this gap by exploring the psychosocial and structural  
122 factors that influence HIV testing and prevention uptake among internal migrants through  
123 qualitative interviews with internal migrant men in Johannesburg, South Africa. South Africa  
124 must engage this key population if it is to meet its national goal of eliminating HIV as a public  
125 health threat with “nobody left behind.”<sup>43</sup>

126

## 127 **Methods**

128

### 129 *Study Setting and Participants*

130

131 This study is based in Johannesburg, the most populous city in South Africa. In our team’s prior  
132 pilot work among migrant men in Johannesburg, we chose community-based recruitment sites in  
133 the Hillbrow, Midrand, Woodmead and Roodeport areas following a period of observation and  
134 discussion with community stakeholders. For this study focusing specifically on internal migrant  
135 men, we selected two sites where there were high proportions of internal migrant men, a site in  
136 Midrand area north of Johannesburg close to factories and the Displaced Persons Unit (DPU) in  
137 Hillbrow (Johannesburg central.) Similar to our prior research among this population,<sup>30,44,45</sup> we  
138 chose to focus on community sites in order to reach men who may not seek care at clinics.

139

140 Recruitment occurred in August 2022. Team members recruited participants by first asking  
141 leadership at the sites if the study team could recruit there on specific days. On site, the research  
142 assistants (RA) distributed study flyers. These flyers gave information about the study and  
143 invited men to contact the study team if they were interested in participating. Those men who  
144 made contact were then given further information and taken through the consent process in-  
145 person. The team checked telephone numbers, names, and identifiers to ensure that the same  
146 participant did not enroll twice.

147

### 148 *Eligibility and Sampling*

149 We included men who were 18 years or older, self-reported as an internal migrant (defined as a  
150 South African born outside of Gauteng Province), were willing to participate in a 45 to 60-  
151 minute interview, and able to provide informed consent. Men were excluded from the study if  
152 they were believed to be intoxicated at the time of consent (in which case, they were invited to  
153 return the following day), unable to understand the study information, or had previously enrolled  
154 in the study. In addition to these eligibility criteria, we purposively sampled to seek perspectives  
155 both from migrants who reported living in Johannesburg for a year or less, and those who lived  
156 in Johannesburg for longer durations.

157

### 158 *Study Design Conceptual Framework*

159 Interviews followed an in-depth semi-structured interview guide developed to explore internal  
160 migrant men's experiences, knowledge, and attitudes towards HIV testing and prevention. The  
161 development of our guide was informed by the Theory of Triadic Influence (TTI), a theoretical  
162 model of health behavior used in several HIV-related studies, including in South Africa and by  
163 our team previously.<sup>46-48</sup> TTI posits that there are three streams of influence on health-seeking  
164 behavior: *individual factors* (e.g., personal motivations, knowledge), *social factors* (e.g.,  
165 interpersonal relationships, social norms), and *structural factors* (e.g., healthcare system  
166 structures and policies). Interview questions examined attitudes and behaviors toward HIV  
167 testing and PrEP within each of these streams of influence, such as knowledge of PrEP  
168 (*individual factors*), anticipated HIV stigma (*social factors*), and access to healthcare services  
169 (*structural factors*).

170 *Data Collection and Preparation*

171 Qualitative interviews were completed in person by one of three RAs in a private, secure setting  
172 in August 2022. (See Interview guides in Appendix.) RAs were trained in qualitative  
173 interviewing and fluent in isiZulu, isiXhosa, English and seSotho so as to be able to conduct the  
174 interview in the participant's preferred language. Interviews lasted 45 to 60 minutes. After  
175 completing the survey, participants were reimbursed for their time with a ZAR150 (~USD10)  
176 electronic shopping voucher, sent directly to the participant's cell phone number. The RA  
177 conducting the interview recorded it and took notes. All interview recordings were sent to a  
178 third-party transcription service who transcribed it, and if in a language other than English,  
179 translated it. Each interview was reviewed by the RA who conducted the interview to ensure  
180 accurate transcription and translation. Transcripts were assigned a unique study identification  
181 number to protect participant confidentiality.

182

183 *Data Analysis*

184 Analysis of data aimed to characterize participants' reasons for engaging or not engaging with  
185 HIV testing and PrEP services. We used a mixed deductive and inductive approach informed by  
186 grounded theory.<sup>49</sup> Two team members (MFN, SG) developed an initial codebook based on key  
187 concepts from TTI and the interview protocol, as well as emergent codes from a review of the  
188 initial five interviews. The coding team (MFN, SG, DB, AW) then discussed emerging themes  
189 through repeated review of the transcripts and memoing. Through weekly meetings, the coding  
190 team further refined the codebook, resolving discrepancies through discussion, maintaining an  
191 audit trail of notes and each codebook version. Interviews were coded in Dedoose.<sup>50</sup> Each coding  
192 team member coded the first 20% of transcripts, and interrater reliability testing resulted in a  
193 pooled Cohen's kappa of 0.80. The four coders individually coded the remaining transcripts. We  
194 then reviewed excerpts for each code, identifying repeated patterns of content which formed the  
195 basis for broader themes.<sup>49</sup>

196

197 *Ethical Approval*

198 The ethics committees at the University of the Witwatersrand (M191068), Mass General  
199 Brigham (Harvard University) (2020P002251), and Boston University (H-40529) approved the  
200 study. All participants provided written informed consent.





216

217 *Qualitative Results*

218 We organized themes into barriers to and opportunities for care engagement. Within each of  
219 these sections, we identified and organized factors at individual, social, and structural levels.  
220 Within each of these levels, we identified factors that apply to men more generally as well as  
221 factors specific to migrants.

222

223 *Individual Barriers*

224 Participants framed their decisions around HIV testing within the context of the high levels of  
225 stress they already experience on a day-to-day basis. As shown in Table 2, migrant men  
226 described a “weight” over their lives “that is really heavy from problems and life situations,”  
227 including “depressing thoughts” about finding work. Adding to their stress was their awareness  
228 of HIV risk from unprotected sexual encounters. For most participants, this risk awareness was  
229 not a motivator to seek HIV testing. Rather, HIV testing was more often perceived as an added  
230 burden because of fear that a positive result “might be too stressful for them.” While almost all  
231 participants were knowledgeable about the fact that ART can manage HIV, they nonetheless  
232 described the possibility of a positive diagnosis in dire terms, including “about to die,” “ruin my  
233 life,” “like suicide,” “painful,” and “make [me] more sick.” As one participant described, “We as  
234 men are already carrying a lot. To add another weight on top of that... Emotional stress is more  
235 detrimental than the virus itself.” This burden was further exacerbated for many participants by  
236 virtue of their move to Johannesburg. Migrant men described challenges with navigating a new  
237 city, finding health services, and sometimes personal and family challenges that preceded their  
238 move to Johannesburg, which further taxed their cognitive and emotional bandwidth.

239

240 Complicating this narrative was limited awareness about PrEP among most (60%) participants.  
241 Even those who had heard of it had little knowledge of anyone who had used it before, where to  
242 find it, or how to use it. Participants also mentioned that awareness of HIV prevention options  
243 was particularly low in rural areas of the country, where many migrants had been raised. Given  
244 most participants did not know PrEP would be an option if they tested negative, HIV testing was  
245 associated with few upsides. Thus, fears of testing positive outweighed the potential for relief if  
246 they tested negative. While all participants reported testing for HIV at least once in their life,

247 most tested only when required by a healthcare provider, rather than for prevention. The  
 248 interviewer’s mention of PrEP was usually met with interest, with several respondents  
 249 mentioning how they would trust PrEP if it came from healthcare professionals and after they  
 250 “see it works for certain individuals.”

**Table 2. Individual-level barriers to HIV testing and PrEP use**

| <b>Barriers</b>                       | <b>Examples</b>                                                                                                                                                                                                                                                                                                                                                                                                                                                                              |
|---------------------------------------|----------------------------------------------------------------------------------------------------------------------------------------------------------------------------------------------------------------------------------------------------------------------------------------------------------------------------------------------------------------------------------------------------------------------------------------------------------------------------------------------|
| Challenges coping with life stressors | "Naturally men have that weight over them that is really heavy from problems and life situations. We know that it is in our nature to always make mistakes. Knowing that I have to test is going to put on more weight on me. I feel it will be adding to the problems to go and test. It is going to give me depression to find out that I am HIV positive. It is not that we do not want to test. It’s just that we do not want to know at that certain time." (Migrant from Western Cape) |
| Fears of testing HIV positive         | "People are scared to test. They will rather live in fear not knowing then to find out they are about to die." (Migrant from Limpopo)                                                                                                                                                                                                                                                                                                                                                        |
| Lack awareness or knowledge of PrEP   | "I do not know about [PrEP]. I have only heard rumours. I have never come across someone who have taken them." (Migrant from Mpumalanga)                                                                                                                                                                                                                                                                                                                                                     |
| Seek healthcare for symptoms          | "When I need health care I go to a public clinic because it is free. I wait and see if the sickness lasts for 48 hours then I go to the clinic. Anything that lasts for less than that I can handle." (Migrant from Mpumalanga)                                                                                                                                                                                                                                                              |

251

252

253 *Social Barriers*

254 Gender norms played a large role in influencing participants’ beliefs and behaviors around HIV  
 255 testing and PrEP. Participants described how HIV testing was felt to be a woman’s  
 256 responsibility, and a female partner’s status was assumed to reflect their own status as well. As  
 257 shown in Table 3, most participants reported that clinics are designed to serve women’s needs,  
 258 and the predominance of female health care providers in clinics could be a disincentive to  
 259 seeking care. Some migrants described how traditional gender norms were particularly common  
 260 in their rural homes of origin, and it was hard to shift this perspective in Johannesburg. In  
 261 addition, social gatherings with other men, particularly involving alcohol, emerged as a barrier to  
 262 PrEP use. Participants described how men “are most vulnerable” when they drink because it  
 263 distracts them from taking pills. Drinking also increases their HIV risk because men are less  
 264 likely to use condoms when intoxicated.

265

266 Anticipated stigma was a major concern reported by nearly all men, including stigma from clinic  
 267 staff and within communities. Although most participants reported that they themselves were  
 268 comfortable with others having HIV, they nonetheless worried that testing positive would  
 269 negatively affect their relationship with partners, family, or friends, who “discourage each other  
 270 from testing.” PrEP use posed additional concerns, including the fear that PrEP would be  
 271 mistaken for ART or signal infidelity. In addition, a few participants who knew of PrEP  
 272 mentioned that PrEP is associated with men who have sex with men (MSM), which prompted  
 273 some men “to shy away from using it.” Although this study focused on migrants within South  
 274 Africa, one participant described himself as “a foreigner” within Johannesburg, even though he  
 275 had been in the city for 12 years, which raised concerns for him about how he would be treated  
 276 in healthcare spaces. Another participant felt that travel and being a newcomer in Johannesburg  
 277 for less than a year increased the risk for being “misunderstood” by people who did not know  
 278 him.  
 279

**Table 3. Social-level barriers to HIV testing and PrEP use**

| <b>Barriers</b>      | <b>Examples</b>                                                                                                                                                                                                                                                                                                                                                       |
|----------------------|-----------------------------------------------------------------------------------------------------------------------------------------------------------------------------------------------------------------------------------------------------------------------------------------------------------------------------------------------------------------------|
| Social gender norms  | "Women do not have such problems because the clinics are created for them. Women bear children. So already, they are used to the clinic. Women have many illnesses. I think it is women that transfer infections to men. Maybe going to a men’s clinic would be better. It is quite a challenge to be seen by women going to the clinic." (Migrant from Western Cape) |
| Social alcohol use   | "It is really difficult to help men. Most men like to drink...Being drunk can make them miss the pill if it to be taken daily." (Migrant from KwaZulu-Natal)                                                                                                                                                                                                          |
| Anticipated stigma   |                                                                                                                                                                                                                                                                                                                                                                       |
| Testing HIV positive | "You worry that when you go for an HIV test your results might be different and that will affect the relationship negatively. I think that knowing your status puts a lot of pressure on you." (Migrant from Eastern Cape)                                                                                                                                            |
| PrEP                 | "I think the problem might be to take [PrEP] pills in front of other people." (Migrant from Eastern Cape)                                                                                                                                                                                                                                                             |
| Travel and migration | "Different people, different places. You must be prepared to be misunderstood [when traveling]." [Migrant from Free State]                                                                                                                                                                                                                                            |

280  
 281 *Structural Barriers*  
 282 Structural factors emerged as the largest barrier to HIV testing and PrEP use for migrant men.  
 283 Finding and maintaining work was the biggest priority for all participants. Some managed to find  
 284 intermittent “piece jobs,” i.e., unpredictable day jobs in which men are paid by the hour or day

285 for the work that is done. Others described how their jobs were unexpectedly terminated or how  
286 their pay was insufficient to afford housing or food. Given pressures to work, time was a major  
287 barrier to HIV testing, especially at clinics where participants reported queuing all day. As  
288 shown in Table 4, one participant said, “I have to spend the entire day on the street...waiting for  
289 an opportunity for piece work. If I go for testing, I might miss that opportunity.” Many migrants  
290 reported coming to Johannesburg given its reputation as the “City of Gold” where “opportunities  
291 are broad.” For them, the gap between their dreams and reality was especially stark. Participants  
292 reported that work was not just a means of survival but the necessary precursor to “a home, wife,  
293 and kids...a dream [which] has not materialized.” On the other hand, for those participants with  
294 a family, the immediate need to provide for their children emerged as a higher priority than the  
295 time or transportation costs involved for HIV testing.

296  
297 On top of their livelihood concerns, migrants described challenges adjusting to life in  
298 Johannesburg, including concerns about the fast pace of the city and their own safety.  
299 Participants also described how migrants may be unfamiliar with where HIV services are  
300 located, lack community support to access health services, or not trust services from people they  
301 don’t know. Migrants reported that travel to other parts of the city or country could increase HIV  
302 risk as they were more likely to have unprotected sexual encounters during these times. None of  
303 the participants used PrEP currently, though some hypothesized that traveling, including  
304 overnight travel for piece jobs, might pose a challenge for taking a daily pill. Another participant  
305 also mentioned how “illegal immigrants” have difficulty accessing healthcare in South Africa.  
306

**Table 4. Structural-level barriers to HIV testing and PrEP use**

| <b>Barriers</b>                 | <b>Examples</b>                                                                                                                                                                                                                                                                                                                                                                   |
|---------------------------------|-----------------------------------------------------------------------------------------------------------------------------------------------------------------------------------------------------------------------------------------------------------------------------------------------------------------------------------------------------------------------------------|
| Employment opportunity costs    | "I have to spend the entire day on the street by the robot waiting for an opportunity for piece-work. If I go for testing I might miss that opportunity." (Migrant from KwaZulu-Natal)                                                                                                                                                                                            |
| Traveling for work              | "Because I am always on the go. Even with the piece-jobs sometimes I don't sleep at home. I am concerned that I might miss a pill." (Migrant from Limpopo)                                                                                                                                                                                                                        |
| Adjustment to Johannesburg      | "I am still new in Johannesburg. It is a busy city. It is full of criminals. You cannot even ask people for directions to the clinic. Sometimes health facilities are located down town where we cannot go because it is dangerous. Those are the challenges." (Migrant from Mpumalanga)                                                                                          |
| Lack of residency documentation | "The issue of illegal immigrants is a serious problem in South Africa. We have many illegal immigrants in the country. You find people sick they cannot access health services because they are here illegally. I feel that clinics should be open even to illegal immigrants. If a person has a passport, they should be able to access health services." (Migrant from Limpopo) |

307

308 *Opportunities*

309 As shown in Table 5, participants described several opportunities for engagement in HIV testing,  
 310 prevention, and care, including those that relate to many of the themes above. Despite the  
 311 challenges of daily life in Johannesburg, participants noted that HIV services in community-  
 312 based settings such as pharmacies, pop-up tents, and shops made access easier. Most appreciated  
 313 the sense of anonymity they felt seeking healthcare in Johannesburg as compared to rural areas,  
 314 where they had more concern for unintentional disclosure from clinic staff or other patients who  
 315 knew them. In fact, some participants reported that if diagnosed with HIV, they would feel most  
 316 comfortable seeking support from healthcare staff in Johannesburg. More readily available HIV  
 317 information in Johannesburg was also perceived as an opportunity to be harnessed to promote  
 318 greater care engagement. As one participant shared, "I think people need to be informed about  
 319 PrEP. This will encourage more people to do HIV testing so they can use PrEP if their results are  
 320 negative."

321

322 Social support from other men surfaced as an important resource for some participants, including  
 323 through religious organizations, bars, and sporting activities. At the homeless shelter,  
 324 participants described how ten men in a room together would "share stories every night before  
 325 we go to bed," while others had support from family members or friends already in

326 Johannesburg. In contrast to participants who described their sense of masculinity as a deterrent  
327 to care seeking (e.g., considering their wife’s HIV status as a proxy for their own), for other men,  
328 their sense of their role as a man motivated HIV testing and prevention. For example, men  
329 described a sense of responsibility for their family: “You don’t want to die and leave your family  
330 behind.” Others drew on their sense of masculinity or felt compelled to test for the sake of their  
331 partner: “I am the man and I have to protect my partner.” Lastly, some participants described  
332 positive coping skills which help them to feel “courage to deal with whatever results” from HIV  
333 testing.  
334

**Table 5. Opportunities for HIV testing and PrEP use**

| <b>Opportunities</b>                   | <b>Examples</b>                                                                                                                                                                                                                                                                                                           |
|----------------------------------------|---------------------------------------------------------------------------------------------------------------------------------------------------------------------------------------------------------------------------------------------------------------------------------------------------------------------------|
| <b>Differentiated service delivery</b> | "I would be comfortable accessing PrEP even outside the clinic, in pharmacies and shops. That will make it even more accessible to people." (Migrant from Eastern Cape)                                                                                                                                                   |
| <b>Anonymity</b>                       | "Yes I am comfortable [testing for HIV] in Johannesburg and free. There are no chances of meeting somebody I know." (Migrant from Limpopo)                                                                                                                                                                                |
| <b>PrEP information</b>                | "PrEP need to be advertised more. It needs to get out there." (Migrant from KwaZulu-Natal)                                                                                                                                                                                                                                |
| <b>Social support</b>                  | "At the shelter there is tons of us. There are ladies and guys. There is six of us in a room. They are my new family." (Migrant from Limpopo)                                                                                                                                                                             |
| <b>Masculinity</b>                     | "I sit down and talk to myself and tell myself that I am a man and that I can face any challenge." (Migrant from Limpopo)                                                                                                                                                                                                 |
| <b>Positive coping skills</b>          | "In the past I was very scared to test. But I have matured and I always want to go and test for HIV. When I go I come back happy. I always expect anything and I have courage to deal with whatever results I get. I think I am comforted by the fact that HIV can be managed by treatment." (Migrant from KwaZulu-Natal) |

335

336

### 337 **Discussion**

338

339 Our findings of barriers to and opportunities for HIV testing and PrEP for internal migrant men  
340 in Johannesburg revealed themes common to men generally as well as themes exacerbated or  
341 unique to men who migrate internally within South Africa across all levels of influence  
342 (individual, social, structural), as shown in Figure 1. Similar to prior research, we found that  
343 substantial fears of an HIV-positive diagnosis<sup>47-49</sup> and anticipated stigma<sup>53,54</sup> remain major

344 barriers to seeking HIV testing for men. Building on this research, our data highlight that men  
345 worry that a positive HIV diagnosis on top of pre-existing livelihood stressors would overwhelm  
346 their ability to cope and thus their mental wellbeing. Unemployment rates in South Africa are  
347 greater than 30%,<sup>55</sup> and studies have shown the stressful toll that unemployment takes on South  
348 African men, leading not only to financial strain but also lower self-esteem and decreased social  
349 status.<sup>56</sup> This suggests the need for interventions for men which address both livelihood stressors  
350 and coping skills. For example, a livelihood support intervention among persons living with HIV  
351 in Kenya showed evidence of mental health improvements,<sup>57</sup> and the MenStar Strategy to engage  
352 men in HIV care in South Africa includes a focus on building coping potential.<sup>58</sup> However,  
353 problematic alcohol use among men – prevalent in resource-constrained settings in South Africa  
354 and often the foundation of social gatherings<sup>59</sup> – further complicates this picture as alcohol use  
355 may be associated with HIV risk behaviors.<sup>60</sup> Efforts to address alcohol use and HIV risk have  
356 had mixed success, with evidence showing that social barriers (e.g., social norms around  
357 substance use) and structural level barriers (e.g., unemployment, poverty, violence, limited clinic  
358 resources) constrain long-lasting behavior change.<sup>61,62</sup>

359  
360 Building on these barriers for men, our data uncovered challenges that are exacerbated for and/or  
361 unique to South African migrants. Migrants may have a higher likelihood of life stressors, given  
362 the conditions that prompted their move as well as their near-universal need to find employment.  
363 Migrants are also faced with numerous additional social and structural stressors by virtue of  
364 needing to start afresh in a new city, including securing housing, navigating a new health system,  
365 building a new social network, prioritizing physical safety, and adjusting to the fast pace of life  
366 in Johannesburg. Each stressor takes up some degree of an individual’s “cognitive bandwidth,”  
367 which encompasses both cognitive capacity (psychological mechanisms which allow for  
368 reasoning, problem solving, and retaining information) and executive control (ability to plan,  
369 manage attention, and control actions).<sup>63</sup> Each individual has a finite amount of cognitive  
370 bandwidth. An accumulation of stressors can tax this bandwidth and impede cognitive  
371 functioning, making it more difficult to manage immediate stressors, let alone to process new  
372 information (e.g., about PrEP) or prioritize HIV testing or preventative care.<sup>63–65</sup> Similarly,  
373 research among international migrants has found that high levels of unemployment and  
374 competing life priorities, especially in the early phase of resettlement, can make it harder for



375 migrants to seek preventative care.<sup>66</sup> In addition to interventions focusing on livelihood and  
376 coping strategies, interventions which help migrants to adjust to life in their new city and  
377 navigate available health resources may also facilitate care engagement. For example,  
378 community navigator health workers in North America have been used to offer culturally  
379 tailored educational and communication support to guide migrants in overcoming barriers to  
380 healthcare.<sup>67,68</sup>  
381

**Figure 1.** Barriers to HIV testing and prevention for men and internal migrant men in Johannesburg. In the yellow oval in the figure below, we show themes found to be common to men more generally, including migrants, organized by individual, social and structural levels of influence. In addition, we found themes which were heightened for migrant men, shown in the pink oval.

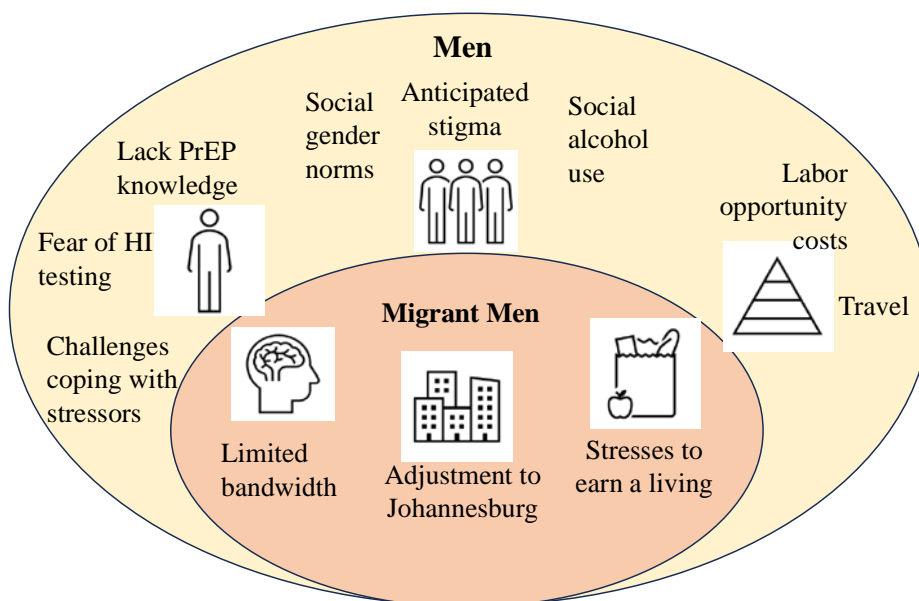

382  
383  
384

385 Despite these challenges, our data identified opportunities to engage migrants in HIV care,  
386 particularly for new arrivals to Johannesburg. As is the case in many countries worldwide, rural  
387 communities in South Africa often have less access to healthcare as compared to access in urban  
388 centers,<sup>69</sup> and fears of unintentional disclosure may be heightened in rural clinics where seeking  
389 care means being seen by known community members.<sup>70</sup> As our data showed, Johannesburg  
390 offers migrants greater opportunities to not only seek convenient, anonymous care but also to  
391 learn about HIV prevention options, such as PrEP. Similarly, research among international



392 migrants has shown that many first learn about PrEP in their destination countries.<sup>66</sup> In addition,  
393 migration may lessen the influence of family and culture norms from one's home of origin, e.g.  
394 social constructs of gender which may limit men's care-seeking.<sup>53</sup> While some of our  
395 participants reported either social isolation or relying on pre-existing family members in  
396 Johannesburg, others described information sharing and new bonds that formed between  
397 themselves and other migrant men who were new to the city, especially for participants in the  
398 shelter. Thus, particularly for newcomers to Johannesburg, there may be an opportunity to  
399 provide easily accessible HIV services to migrant men at a time when they may be less  
400 constrained by prior social obligations and freer to adopt new social norms and behaviors.<sup>71</sup>

401  
402 This study must be interpreted within limitations of this work. Many participants in our sample  
403 were unaware of PrEP, and none reported using it, similar to other research on barriers and  
404 facilitators of PrEP uptake for men in sub-Saharan Africa.<sup>20,72,73</sup> Thus, it is possible that PrEP  
405 may have theoretical appeal in the context of first hearing about it, and social desirability bias  
406 may impact participants' enthusiasm for PrEP as part of a research study. Barriers to PrEP use  
407 may emerge more prominently for men with experience using it. For example, accessibility  
408 issues were found to impede continuation of PrEP among women who previously used it as part  
409 of a study in South Africa.<sup>74</sup> In addition, given the nature of this qualitative study and our focus  
410 on two recruitment sites in Johannesburg, the results cannot be generalized to all migrant  
411 populations within or outside of Johannesburg, nor can we statistically analyze differences  
412 between different sub-populations, e.g., newcomers versus longer-term migrants. Rather, we  
413 aimed to shed light on mechanisms underlying engagement in HIV testing and prevention to  
414 deepen our understanding of experiences for a random sample of internal migrants seeking  
415 shelter and work in the city. Many of the themes that we uncovered were similar to those found  
416 previously for men more generally, suggesting that strategies to engage migrant men (e.g.,  
417 workplace HIV testing and PrEP availability) may have benefits for other men as well. Future  
418 research focusing on international migrants in South Africa is also warranted to understand the  
419 factors influencing their HIV care engagement.

420  
421  
422

423 **Conclusions**

424  
425 Migrant men come to Johannesburg to find work, but their struggle to survive without reliable  
426 income causes daily stress. Despite caring about their health, constraints on their time and  
427 cognitive bandwidth limit their ability to seek health services, particularly given fears of testing  
428 positive for HIV, anticipated stigma, and limited knowledge about the opportunity for PrEP  
429 should they test negative. Yet Johannesburg also presents opportunities for HIV testing and PrEP  
430 use for migrant men who perceive greater availability and anonymity of HIV information and  
431 services in the city as compared to rural homes of origin, and also more willingness to adopt new  
432 beliefs and behaviors. Bringing HIV services to migrant men at community sites may ease the  
433 burden of accessing these services. Including PrEP counseling and services alongside HIV  
434 testing may further encourage men to test, particularly if integrated into counseling on livelihood  
435 and coping strategies, as well as support for navigating health services in Johannesburg.

436  
437  
438  
439  
440  
441  
442  
443  
444  
445  
446  
447  
448  
449  
450  
451  
452  
453  
454

455 **References**

456

- 457 1. Country Factsheets: South Africa [Internet]. Joint United Nations Programme on  
458 HIV/AIDS (UNAIDS). 2021. Available from:  
459 <https://www.unaids.org/en/regionscountries/countries/southafrica>  
460
- 461 2. Human Sciences Research Council (HSRC). South African National HIV Prevalence,  
462 Incidence, Behaviour and Communication Survey, 2017.
- 463 3. Nardell MF, Adeoti O, Peters C, Kakuhikire B, Govathson-Mandimika C, Long L, et al.  
464 Men missing from the HIV care continuum in sub-Saharan Africa: a meta-analysis and  
465 meta-synthesis. *J Int AIDS Soc*. 2022 Mar;25(3):e25889.
- 466 4. Tsai AC, Siedner MJ. The Missing Men: HIV Treatment Scale-Up and Life Expectancy in  
467 Sub-Saharan Africa. *PLOS Med*. 2015 Nov 24;12(11):e1001906.
- 468 5. Cornell M, Cox V, Wilkinson L. Public health blindness towards men in HIV programmes  
469 in Africa. *Trop Med Int Health*. 2015 Dec;20(12):1634–5.
- 470 6. Makusha T, Rooyen H, Cornell M. Reframing the approach to heterosexual men in the HIV  
471 epidemic in sub-Saharan Africa. *J Int AIDS Soc* [Internet]. 2020 Jun [cited 2020 Dec  
472 11];23(S2). Available from: <https://onlinelibrary.wiley.com/doi/abs/10.1002/jia2.25510>
- 473 7. Grobler A, Cawood C, Khanyile D, Puren A, Kharsany ABM. Progress of UNAIDS 90-90-  
474 90 targets in a district in KwaZulu-Natal, South Africa, with high HIV burden, in the  
475 HIPSS study: a household-based complex multilevel community survey. *Lancet HIV*. 2017  
476 Nov;4(11):e505–13.
- 477 8. Zuma K, Simbayi L, Zungu N, Moyo S, Marinda E, Jooste S, et al. The HIV Epidemic in  
478 South Africa: Key Findings from 2017 National Population-Based Survey. *Int J Environ  
479 Res Public Health*. 2022 Jul 1;19(13):8125.
- 480 9. A snapshot of men and HIV in South Africa. UNAIDS; 2017.
- 481 10. Lippman SA, El Ayadi AM, Grignon JS, Puren A, Liegler T, Venter WDF, et al.  
482 Improvements in the South African HIV care cascade: findings on 90-90-90 targets from  
483 successive population-representative surveys in North West Province. *J Int AIDS Soc*  
484 [Internet]. 2019 Jun [cited 2021 Feb 16];22(6). Available from:  
485 <https://onlinelibrary.wiley.com/doi/10.1002/jia2.25295>
- 486 11. Cornell M, Schomaker M, Garone DB, Giddy J, Hoffmann CJ, Lessells R, et al. Gender  
487 Differences in Survival among Adult Patients Starting Antiretroviral Therapy in South  
488 Africa: A Multicentre Cohort Study. Celentano DD, editor. *PLoS Med*. 2012 Sep  
489 4;9(9):e1001304.
- 490 12. Bor J, Rosen S, Chimbindi N, Haber N, Herbst K, Mutevedzi T, et al. Mass HIV Treatment  
491 and Sex Disparities in Life Expectancy: Demographic Surveillance in Rural South Africa.  
492 Tsai AC, editor. *PLOS Med*. 2015 Nov 24;12(11):e1001905.

- 493 13. De Oliveira T, Kharsany ABM, Gräf T, Cawood C, Khanyile D, Grobler A, et al.  
494 Transmission networks and risk of HIV infection in KwaZulu-Natal, South Africa: a  
495 community-wide phylogenetic study. *Lancet HIV*. 2017 Jan;4(1):e41–50.
- 496 14. Van Damme L, Corneli A, Ahmed K, Agot K, Lombaard J, Kapiga S, et al. Preexposure  
497 Prophylaxis for HIV Infection among African Women. *N Engl J Med*. 2012 Aug  
498 2;367(5):411–22.
- 499 15. Marrazzo JM, Ramjee G, Richardson BA, Gomez K, Mgodini N, Nair G, et al. Tenofovir-  
500 Based Preexposure Prophylaxis for HIV Infection among African Women. *N Engl J Med*.  
501 2015 Feb 5;372(6):509–18.
- 502 16. Grant RM, Lama JR, Anderson PL, McMahan V, Liu AY, Vargas L, et al. Preexposure  
503 Chemoprophylaxis for HIV Prevention in Men Who Have Sex with Men. *N Engl J Med*.  
504 2010 Dec 30;363(27):2587–99.
- 505 17. Baeten JM, Donnell D, Ndase P, Mugo NR, Campbell JD, Wangisi J, et al. Antiretroviral  
506 Prophylaxis for HIV Prevention in Heterosexual Men and Women. *N Engl J Med*. 2012  
507 Aug 2;367(5):399–410.
- 508 18. Hannaford A, Lim J, Moll AP, Khoza B, Shenoi SV. ‘PrEP should be for men only’: Young  
509 heterosexual men’s views on PrEP in rural South Africa. *Glob Public Health*. 2020 Sep  
510 1;15(9):1337–48.
- 511 19. Cheng CY, Quaipe M, Eakle R, Cabrera Escobar MA, Vickerman P, Terris-Prestholt F.  
512 Determinants of heterosexual men’s demand for long-acting injectable pre-exposure  
513 prophylaxis (PrEP) for HIV in urban South Africa. *BMC Public Health*. 2019  
514 Dec;19(1):996.
- 515 20. Shamu S, Shamu P, Khupakonke S, Farirai T, Chidarikire T, Guloba G, et al. Pre-exposure  
516 prophylaxis (PrEP) awareness, attitudes and uptake willingness among young people:  
517 gender differences and associated factors in two South African districts. *Glob Health  
518 Action*. 2021 Jan 1;14(1):1886455.
- 519 21. Rousseau E, Bekker LG, Julies RF, Celum C, Morton J, Johnson R, et al. A community-  
520 based mobile clinic model delivering PrEP for HIV prevention to adolescent girls and  
521 young women in Cape Town, South Africa. *BMC Health Serv Res*. 2021 Dec;21(1):888.
- 522 22. Bekker LG, Rebe K, Venter F, Maartens G, Moorhouse M, Conradie F, et al. Southern  
523 African guidelines on the safe use of pre-exposure prophylaxis in persons at risk of  
524 acquiring HIV-1 infection. *South Afr J HIV Med*. 2016;17(1):455.
- 525 23. Pillay D, Stankevitz K, Lanham M, Ridgeway K, Murire M, Briedenhann E, et al. Factors  
526 influencing uptake, continuation, and discontinuation of oral PrEP among clients at sex  
527 worker and MSM facilities in South Africa. Galea JT, editor. *PLOS ONE*. 2020 Apr  
528 30;15(4):e0228620.

- 529 24. Emmanuel G, Folayan M, Undelikwe G, Ochonye B, Jayeoba T, Yusuf A, et al.  
530 Community perspectives on barriers and challenges to HIV pre-exposure prophylaxis  
531 access by men who have sex with men and female sex workers access in Nigeria. *BMC*  
532 *Public Health*. 2020 Dec;20(1):69.
- 533 25. Vogelzang M, Terris-Prestholt F, Vickerman P, Delany-Moretlwe S, Travill D, Quaife M.  
534 Cost-Effectiveness of HIV Pre-exposure Prophylaxis Among Heterosexual Men in South  
535 Africa: A Cost-Utility Modeling Analysis. *JAIDS J Acquir Immune Defic Syndr*. 2020 Jun  
536 1;84(2):173–81.
- 537 26. Bekker LG, Brown B, Joseph-Davey D, Gill K, Moorhouse M, Delany-Moretlwe S, et al.  
538 Southern African guidelines on the safe, easy and effective use of pre-exposure  
539 prophylaxis: 2020. *South Afr J HIV Med [Internet]*. 2020 Dec 10 [cited 2023 May  
540 18];21(1). Available from: <https://sajhivmed.org.za/index.php/hivmed/article/view/1152>
- 541 27. Anglewicz P, VanLandingham M, Manda-Taylor L, Kohler HP. Cohort profile: internal  
542 migration in sub-Saharan Africa—The Migration and Health in Malawi (MHM) study.  
543 *BMJ Open*. 2017 May;7(5):e014799.
- 544 28. Vearey J. Learning from HIV: Exploring migration and health in South Africa. *Glob Public*  
545 *Health*. 2012 Jan;7(1):58–70.
- 546 29. Lurie MN, Williams BG, Zuma K, Mkaya-Mwamburi D, Garnett GP, Sturm AW, et al. The  
547 Impact of Migration on HIV-1 Transmission in South Africa: A Study of Migrant and  
548 Nonmigrant Men and Their Partners. *Sex Transm Dis*. 2003 Feb;30(2):149–56.
- 549 30. Nardell MF, Govathson C, Mngadi Ncube S, Ngcobo N, Letswalo D, Long L, et al.  
550 Migratory Men and Care Engagement: A Community-Based Study in Johannesburg, South  
551 Africa. Oral Presentation presented at: International AIDS Society; 2021.
- 552 31. Human Mobility and HIV [Internet]. IOM UN Migration. [cited 2023 May 19]. Available  
553 from: <https://www.iom.int/human-mobility-and-hiv>
- 554 32. Dobra A, Bärnighausen T, Vandormael A, Tanser F. Space-time migration patterns and risk  
555 of HIV acquisition in rural South Africa: *AIDS*. 2017 Jan;31(1):137–45.
- 556 33. McGrath N, Eaton JW, Newell ML, Hosegood V. Migration, sexual behaviour, and HIV  
557 risk: a general population cohort in rural South Africa. *Lancet HIV*. 2015 Jun;2(6):e252–9.
- 558 34. Ginsburg C, Collinson MA, Gómez-Olivé FX, Gross M, Harawa S, Lurie MN, et al.  
559 Internal migration and health in South Africa: determinants of healthcare utilisation in a  
560 young adult cohort. *BMC Public Health*. 2021 Dec;21(1):554.
- 561 35. Kranzer K, van Schaik N, Karmue U, Middelkoop K, Sebastian E, Lawn SD, et al. High  
562 Prevalence of Self-Reported Undiagnosed HIV despite High Coverage of HIV Testing: A  
563 Cross-Sectional Population Based Sero-Survey in South Africa. Landay A, editor. *PLoS*  
564 *ONE*. 2011 Sep 28;6(9):e25244.

- 565 36. Beia T, Kielmann K, Diaconu K. Changing men or changing health systems? A scoping  
566 review of interventions, services and programmes targeting men's health in sub-Saharan  
567 Africa. *Int J Equity Health*. 2021 Dec;20(1):87.
- 568 37. Floyd S, Shanaube K, Yang B, Schaap A, Griffith S, Phiri M, et al. HIV testing and  
569 treatment coverage achieved after 4 years across 14 urban and peri-urban communities in  
570 Zambia and South Africa: An analysis of findings from the HPTN 071 (PopART) trial.  
571 Geng EH, editor. *PLOS Med*. 2020 Apr 2;17(4):e1003067.
- 572 38. Bell M, Charles-Edwards E, Ueffing P, Stillwell J, Kupiszewski M, Kupiszewska D.  
573 Internal Migration and Development: Comparing Migration Intensities Around the World.  
574 *Popul Dev Rev*. 2015 Mar;41(1):33–58.
- 575 39. Mass migration to Johannesburg and Pretoria - here's how many South Africans are moving  
576 [Internet]. *Business Tech*. 2020. Available from:  
577 <https://businesstech.co.za/news/property/379407/mass-migration-to-johannesburg-and-pretoria-heres-how-many-south-africans-are-moving/>  
578
- 579 40. Crush J, Tawodzera G. Medical Xenophobia and Zimbabwean Migrant Access to Public  
580 Health Services in South Africa. *J Ethn Migr Stud*. 2014 Apr 3;40(4):655–70.
- 581 41. Mukumbang FC, Ambe AN, Adebisi BO. Unspoken inequality: how COVID-19 has  
582 exacerbated existing vulnerabilities of asylum-seekers, refugees, and undocumented  
583 migrants in South Africa. *Int J Equity Health*. 2020 Dec;19(1):141.
- 584 42. Falcao J, Ahoua L, Zerbe A, di Mattei P, Baggaley R, Chivurre V, et al. Willingness to use  
585 short-term oral pre-exposure prophylaxis (PrEP) by migrant miners and female partners of  
586 migrant miners in Mozambique. *Cult Health Sex*. 2017 Dec 2;19(12):1389–403.
- 587 43. Let Our Actions Count: South Africa's National Strategic Plan for HIV, TB, and STIs 2017-  
588 2022 [Internet]. 2023 May. Available from:  
589 [https://www.gov.za/sites/default/files/gcis\\_document/201705/nsp-hiv-tb-stia.pdf](https://www.gov.za/sites/default/files/gcis_document/201705/nsp-hiv-tb-stia.pdf)
- 590 44. Pascoe S, Govathson C, Mngadi Ncube S, Ngcobo N, Nardell MF, Katz IT, et al. Fast and  
591 friendly is key to keeping men on HIV treatment! - Results from a discrete choice  
592 experiment to understand men's preferences in Johannesburg, South Africa for HIV  
593 treatment services. Oral Presentation presented at: International AIDS Society; 2021.
- 594 45. Pascoe S, Mngadi-Ncube S, Ngcobo N, Govathson C, Letswalo D, Nardell M, et al.  
595 Understanding HIV and health care utilisation among men in Gauteng, South Africa. In  
596 2021.
- 597 46. Flay B, Snyder F, Petraitis J. The Theory of Triadic Influence. In: DiClemente RJ, Crosby  
598 RA, Kegler MC, editors. *Emerging theories in health promotion practice and research*. 2nd  
599 ed. New York: Jossey-Bass; 2009.
- 600 47. Katz IT, Ngure K, Kamolloh K, Ogello V, Okombo M, Thuo NB, et al. Multi-level Factors  
601 Driving Pre-exposure Prophylaxis Non-initiation Among Young Women at High Risk for



- 602 HIV in Kenya. *AIDS Behav* [Internet]. 2022 Aug 5 [cited 2022 Nov 9]; Available from:  
603 <https://link.springer.com/10.1007/s10461-022-03748-9>
- 604 48. Earnshaw VA, Bogart LM, Laurenceau JP, Chan BT, Maughan-Brown BG, Dietrich JJ, et  
605 al. Internalized HIV stigma, ART initiation and HIV RNA suppression in South Africa:  
606 exploring avoidant coping as a longitudinal mediator. 2018;7.
- 607 49. Draucker CB, Martsof DS, Ross R, Rusk TB. Theoretical Sampling and Category  
608 Development in Grounded Theory. *Qual Health Res*. 2007 Oct;17(8):1137–48.
- 609 50. Dedoose [Internet]. Los Angeles, CA: SocioCultural Research Consultants, LLC; 2021  
610 [cited 2022 Dec 9]. Available from: [www.dedoose.com](http://www.dedoose.com)
- 611 51. Bell J, Sharma S, Malone S, Levy M, Reast J, Ciecielag J, et al. Targeting interventions for  
612 HIV testing and treatment uptake: An attitudinal and behavioural segmentation of men aged  
613 20–34 in KwaZulu-Natal and Mpumalanga, South Africa. Wechsberg W, editor. *PLOS*  
614 *ONE*. 2021 Mar 10;16(3):e0247483.
- 615 52. Naugle DA, Tibbels NJ, Hendrickson ZM, Dosso A, Van Lith L, Mallalieu EC, et al.  
616 Bringing fear into focus: The intersections of HIV and masculine gender norms in Côte  
617 d’Ivoire. Galea JT, editor. *PLOS ONE*. 2019 Oct 23;14(10):e0223414.
- 618 53. Treves-Kagan S, El Ayadi AM, Pettifor A, MacPhail C, Twine R, Maman S, et al. Gender,  
619 HIV Testing and Stigma: The Association of HIV Testing Behaviors and Community-Level  
620 and Individual-Level Stigma in Rural South Africa Differ for Men and Women. *AIDS*  
621 *Behav*. 2017 Sep;21(9):2579–88.
- 622 54. Hlongwa M, Mashamba-Thompson T, Makhunga S, Hlongwana K. Barriers to HIV testing  
623 uptake among men in sub-Saharan Africa: a scoping review. *Afr J AIDS Res*. 2020 Jan  
624 2;19(1):13–23.
- 625 55. Gumbi K. South Africa’s unemployment rate rises amid power crisis [Internet]. Reuters.  
626 2023 [cited 2023 Jun 26]. Available from: [https://www.reuters.com/world/africa/south-](https://www.reuters.com/world/africa/south-africas-unemployment-rate-rises-329-q1-2023-05-16/)  
627 [africas-unemployment-rate-rises-329-q1-2023-05-16/](https://www.reuters.com/world/africa/south-africas-unemployment-rate-rises-329-q1-2023-05-16/)
- 628 56. Peer N, Lombard C, Steyn K, Levitt N. A high burden of adverse life events and poor  
629 coping mechanisms experienced by urban-dwelling black South Africans. Annunziato RA,  
630 editor. *PLOS ONE*. 2020 Sep 10;15(9):e0238320.
- 631 57. Hatcher AM, Lemus Hufstedler E, Doria K, Dworkin SL, Weke E, Conroy A, et al.  
632 Mechanisms and perceived mental health changes after a livelihood intervention for HIV-  
633 positive Kenyans: Longitudinal, qualitative findings. *Transcult Psychiatry*. 2020  
634 Feb;57(1):124–39.
- 635 58. MenStar Coalition. MenStar Strategy [Internet]. [cited 2023 Jun 26]. Available from:  
636 <https://www.state.gov/wp-content/uploads/2020/06/MenStar-Strategy.pdf>

- 637 59. Martinez P, Lien L, Landheim A, Kowal P, Clausen T. Quality of life and social  
638 engagement of alcohol abstainers and users among older adults in South Africa. *BMC*  
639 *Public Health*. 2014 Dec;14(1):316.
- 640 60. Hatcher AM, Gibbs A, McBride RS, Rebombo D, Khumalo M, Christofides NJ. Gendered  
641 syndemic of intimate partner violence, alcohol misuse, and HIV risk among peri-urban,  
642 heterosexual men in South Africa. *Soc Sci Med*. 2022 Feb;295:112637.
- 643 61. Rabie S, Tomlinson M, Almirol E, Stewart J, Skiti Z, Weiss RE, et al. Utilizing Soccer for  
644 Delivery of HIV and Substance Use Prevention for Young South African Men: 6-Month  
645 Outcomes of a Cluster Randomized Controlled Trial. *AIDS Behav*. 2023 Mar;27(3):842–  
646 54.
- 647 62. Huis In 'T Veld D, Ensoy-Musoro C, Pengpid S, Peltzer K, Colebunders R. The efficacy of  
648 a brief intervention to reduce alcohol use in persons with HIV in South Africa, a  
649 randomized clinical trial. De Socio GV, editor. *PLOS ONE*. 2019 Aug 20;14(8):e0220799.
- 650 63. Mullainathan S, Shafir E. Freeing Up Intelligence. *Scientific American Mind*. 2014 Feb;57–  
651 63.
- 652 64. Crielaard L, Nicolaou M, Sawyer A, Quax R, Stronks K. Understanding the impact of  
653 exposure to adverse socioeconomic conditions on chronic stress from a complexity science  
654 perspective. *BMC Med*. 2021 Dec;19(1):242.
- 655 65. Vélez-Coto M, Rute-Pérez S, Pérez-García M, Caracuel A. Unemployment and general  
656 cognitive ability: A review and meta-analysis. *J Econ Psychol*. 2021 Dec;87:102430.
- 657 66. Tieosapjaroen W, Zhang Y, Fairley CK, Zhang L, Chow EPF, Phillips TR, et al. Improving  
658 access to oral pre-exposure prophylaxis for HIV among international migrant populations.  
659 *Lancet Public Health*. 2023 Aug;8(8):e651–8.
- 660 67. Shommu NS, Ahmed S, Rumana N, Barron GRS, McBrien KA, Turin TC. What is the  
661 scope of improving immigrant and ethnic minority healthcare using community navigators:  
662 A systematic scoping review. *Int J Equity Health*. 2016 Dec;15(1):6.
- 663 68. Cultural Navigators to Liaise Between Communities and Public Health [Internet].  
664 University of Minnesota National Resource Center for Refugees, Immigrants, and  
665 Migrants. Available from: [https://nrcrim.org/cultural-navigators-liaise-between-](https://nrcrim.org/cultural-navigators-liaise-between-communities-and-public-health)  
666 [communities-and-public-health](https://nrcrim.org/cultural-navigators-liaise-between-communities-and-public-health)
- 667 69. A human step to equal health care in South Africa's rural hospitals [Internet]. The  
668 Conversation. 2015 [cited 2023 Jun 27]. Available from: [https://theconversation.com/a-](https://theconversation.com/a-human-step-to-equal-health-care-in-south-africas-rural-hospitals-41648)  
669 [human-step-to-equal-health-care-in-south-africas-rural-hospitals-41648](https://theconversation.com/a-human-step-to-equal-health-care-in-south-africas-rural-hospitals-41648)
- 670 70. Treves-Kagan S, Steward WT, Ntswane L, Haller R, Gilvydis JM, Gulati H, et al. Why  
671 increasing availability of ART is not enough: a rapid, community-based study on how HIV-  
672 related stigma impacts engagement to care in rural South Africa. *BMC Public Health*. 2015  
673 Dec;16(1):87.



- 674 71. Hennink MM, Cooper P, Diamond I. Seasonal Work and Sexual Behavior. *J Sex Res.* 2000  
675 May;37(2):175–83.
- 676 72. Muhumuza R, Ssemata AS, Kakande A, Ahmed N, Atujuna M, Nomvuyo M, et al.  
677 Exploring Perceived Barriers and Facilitators of PrEP Uptake among Young People in  
678 Uganda, Zimbabwe, and South Africa. *Arch Sex Behav.* 2021 May;50(4):1729–42.
- 679 73. Nabunya R, Karis VMS, Nakanwagi LJ, Mukisa P, Muwanguzi PA. Barriers and  
680 facilitators to oral PrEP uptake among high-risk men after HIV testing at workplaces in  
681 Uganda: a qualitative study. *BMC Public Health.* 2023 Feb 20;23(1):365.
- 682 74. Beesham I, Milford C, Smit J, Joseph Davey DL, Baeten JM, Heffron R, et al. Post-trial  
683 access to and use of pre-exposure prophylaxis in Durban, South Africa. *BMC Public*  
684 *Health.* 2023 Jun 22;23(1):1210.
- 685
